# Supplementary material for: In situ coherent diffractive imaging
Source: Springer Nature journal article supplement (doi:10.1038/s41467-018-04259-9), 2018-05-02
Supplement: 41467_2018_4259_MOESM3_ESM.pdf [file 41467_2018_4259_MOESM3_ESM.pdf]

### **Description of Additional Supplementary Files:**

Supplementary Movie 1. **In situ CDI experiment with a materials science sample.** The magnitude of the complex exit waves reconstructed by in situ CDI, capturing the growth of Pb dendrites on Pt electrodes immersed in an aqueous solution of  $\text{Pb}(\text{NO}_3)_2$  as a function of the applied voltage.

Supplementary Movie 2. **In situ CDI experiment with a biological sample.** Phase images of the fusion of glioblastoma cells reconstructed by in situ CDI.
